# Supplementary material for: Investigating the impact of 2-OHOA-embedded liposomes on biophysical properties of cancer cell membranes via Laurdan two-photon microscopy imaging
Source: Research Square preprint supplement (doi:10.21203/rs.3.rs-3953397/v1), 2024-02-28
Supplement: Supplementary file 1 [file be563e1eb7fadb0d3e82e9ac.pdf]

## Supplementary Information

### Investigating the impact of 2-OHOA-embedded liposomes on biophysical properties of cancer cell membranes via Laurdan two-photon microscopy imaging

Xuehui Rui<sup>1, \*</sup>, Yukihiro Okamoto<sup>1</sup>, Shuichiro Fukushima<sup>2</sup>, Nozomi Morishita Watanabe<sup>1</sup>, and Hiroshi Umakoshi<sup>1, \*</sup>

1. Division of Chemical Engineering, Graduate School of Engineering Science, Osaka University, 1-3 Machikaneyamacho, Toyonaka, Osaka 560-8531, Japan.

2. Department of Mechanical Science and Bioengineering, Graduate School of Engineering Science, Osaka University, 1-3 Machikaneyamacho, Toyonaka, Osaka 560-8531, Japan.

#### Corresponding Authors E-mails:

\*Hiroshi Umakoshi: [umakoshi.hiroshi.es@osaka-u.ac.jp](mailto:umakoshi.hiroshi.es@osaka-u.ac.jp)

\*Xuehui Rui: [xuehui.rui@cheng.es.osaka-u.ac.jp](mailto:xuehui.rui@cheng.es.osaka-u.ac.jp)

16 **Investigating the impact of 2-OHOA-embedded Liposomes on biophysical properties of**  
 17 **cancer cell membranes via Laurdan two-photon microscopy imaging**

18 This supplementary information contains the following sections:

- 19 1. Liposome DOPC quantification results;
- 20 2. Influence of DOPC on cell membrane fluidities investigation results;
- 21 3. *GP* histograms deconvolution results;
- 22 4. Comparison of the influence of 2-OHOA-embedded liposomes and free 2-OHOA  
 23 (fluorescence spectrometer measurements);
- 24 5. Lipid droplet staining and observation;
- 25 6. Illustration of endocytosis-dependent enhancement of 2-OHOA liposome performance;
- 26 7. MTT assay results;
- 27 8. Anticancer performance of 2-OHOA embedded liposome;
- 28 9. G-factor calibration of *GP* images using a reference solution;
- 29 10. Sphingomyelin high-performance thin film chromatography (HPTLC) results

30  
 31 **1. DOPC Quantification**

32 **Table. S-1 DOPC quantification result ( $n=3$ )**

| <b>Formulation</b>                        | <b>DOPC-<br/>only</b> | <b>9-1</b>      | <b>7-3</b>      | <b>5-5</b>      | <b>3-7</b>      | <b>1-9</b>      |
|-------------------------------------------|-----------------------|-----------------|-----------------|-----------------|-----------------|-----------------|
| <b>DOPC<br/>concentration<br/>(mg/mL)</b> | $3.75 \pm 0.16$       | $3.57 \pm 0.40$ | $2.79 \pm 0.08$ | $2.16 \pm 0.04$ | $1.15 \pm 0.03$ | $0.42 \pm 0.01$ |
| <b>DOPC<br/>concentration<br/>(mM)</b>    | $5.11 \pm 0.21$       | $4.86 \pm 0.55$ | $3.81 \pm 0.11$ | $2.94 \pm 0.06$ | $1.56 \pm 0.04$ | $0.57 \pm 0.01$ |
| <b>Total<br/>concentration<br/>(mM)</b>   | $5.11 \pm 0.21$       | $5.40 \pm 0.61$ | $5.44 \pm 0.14$ | $5.88 \pm 0.11$ | $5.21 \pm 0.13$ | $5.66 \pm 0.06$ |

33 Total concentration refers to the combined sum of DOPC and 2-OHOA concentrations.  
 34 LabAssay Phospholipid kit was used to quantify the DOPC in liposomes according to the  
 35 manual.

36 2. Influence of DOPC on cell membrane fluidities

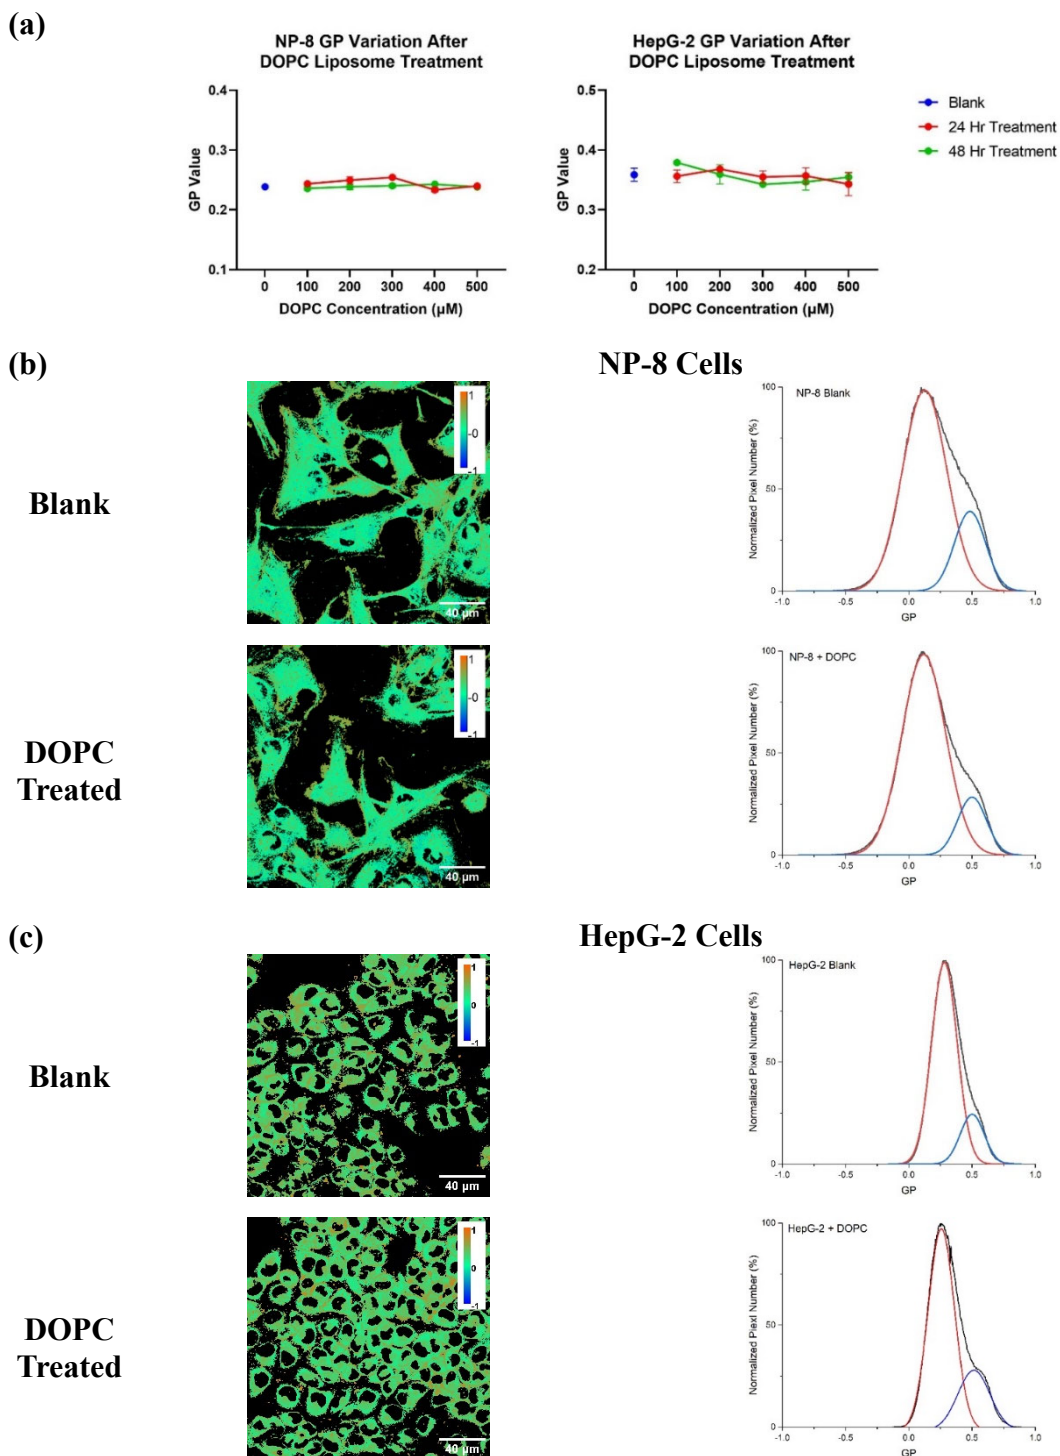

**Figure S-1.** Influence of DOPC liposome treatment on the HepG-2 and NP-8 cell membrane GP variations. (a) NP-8 and HepG-2 Laurdan GP variations after DOPC liposomes treatments for 24/48 h, GP values were obtained from fluorescence spectrometer. Error bars represent  $\pm$  standard deviations,  $n=3$ . (b) GP images and GP histograms of NP-8 cells with and without DOPC liposomes treatments. (c) GP images and GP histograms of HepG-2 cells with and without DOPC liposomes treatments. Cells were treated with 100  $\mu\text{M}$  DOPC liposomes for 24 h. Images were obtained at 37  $^{\circ}\text{C}$ . Scale bars represent 40  $\mu\text{m}$ .

37 **3. GP histograms deconvolution results**38 **Table S-2. Two Gauss distributions of deconvoluted GP histograms**

| Cell   | Treatment        | Low GP<br>Peak<br>center | FWHM 1           | High GP<br>Peak<br>center | FWHM 2           | High GP<br>coverage<br>(%) |
|--------|------------------|--------------------------|------------------|---------------------------|------------------|----------------------------|
| NP-8   | Blank            | 0.116 ±<br>0.015         | 0.394 ±<br>0.048 | 0.481 ±<br>0.024          | 0.291 ±<br>0.023 | 20.54 ±<br>6.98            |
|        | DOPC<br>liposome | 0.128 ±<br>0.041         | 0.427 ±<br>0.112 | 0.476 ±<br>0.043          | 0.336 ±<br>0.044 | 24.25 ±<br>9.18            |
|        | 9-1<br>liposome  | 0.310 ±<br>0.037         | 0.630 ±<br>0.021 | 0.596 ±<br>0.028          | 0.406 ±<br>0.027 | 50.49 ±<br>6.43            |
|        | 7-3<br>liposome  | 0.266 ±<br>0.022         | 0.679 ±<br>0.018 | 0.578 ±<br>0.021          | 0.414 ±<br>0.027 | 45.27 ±<br>2.68            |
|        | 5-5<br>liposome  | 0.223 ±<br>0.023         | 0.678 ±<br>0.014 | 0.531 ±<br>0.026          | 0.447 ±<br>0.016 | 52.95 ±<br>3.00            |
|        | Free 2-<br>OHOA  | 0.155 ±<br>0.015         | 0.710 ±<br>0.019 | 0.475 ±<br>0.008          | 0.487 ±<br>0.012 | 58.93 ±<br>1.88            |
|        | Blank            | 0.279 ±<br>0.030         | 0.237 ±<br>0.011 | 0.500 ±<br>0.058          | 0.277 ±<br>0.060 | 22.32 ±<br>7.20            |
| HepG-2 | DOPC<br>liposome | 0.285 ±<br>0.038         | 0.244 ±<br>0.016 | 0.524 ±<br>0.058          | 0.251 ±<br>0.063 | 21.67 ±<br>10.11           |
|        | 9-1<br>liposome  | 0.359 ±<br>0.020         | 0.295 ±<br>0.027 | 0.593 ±<br>0.007          | 0.217 ±<br>0.015 | 27.80 ±<br>7.01            |
|        | 7-3<br>liposome  | 0.325 ±<br>0.015         | 0.323 ±<br>0.056 | 0.609 ±<br>0.026          | 0.261 ±<br>0.022 | 22.63 ±<br>2.13            |
|        | 5-5<br>liposome  | 0.335 ±<br>0.024         | 0.297 ±<br>0.021 | 0.589 ±<br>0.003          | 0.221 ±<br>0.019 | 26.07 ±<br>4.08            |
|        | Free 2-<br>OHOA  | 0.313 ±<br>0.013         | 0.296 ±<br>0.019 | 0.594 ±<br>0.022          | 0.243 ±<br>0.019 | 25.03 ±<br>4.71            |

39 NP-8 and HepG-2 cells were imaged at 37°C. For the treatment groups, cells were incubated  
40 for 24 h with media containing DOPC liposome (100 μM), 2-OHOA-embedded liposome  
41 (containing 100 μM 2-OHOA) or free 2-OHOA (100 μM). The obtained GP histograms of GP  
42 images, were deconvoluted into two Gauss distributions. The peak center, full width at half  
43 maximum (FWHM), and percentage of pixels associated with high GP peak (High GP  
44 coverage) were averaged over 5-8 images.

45 **4. Comparison of the influence of 2-OHOA-embedded liposomes and free 2-OHOA**

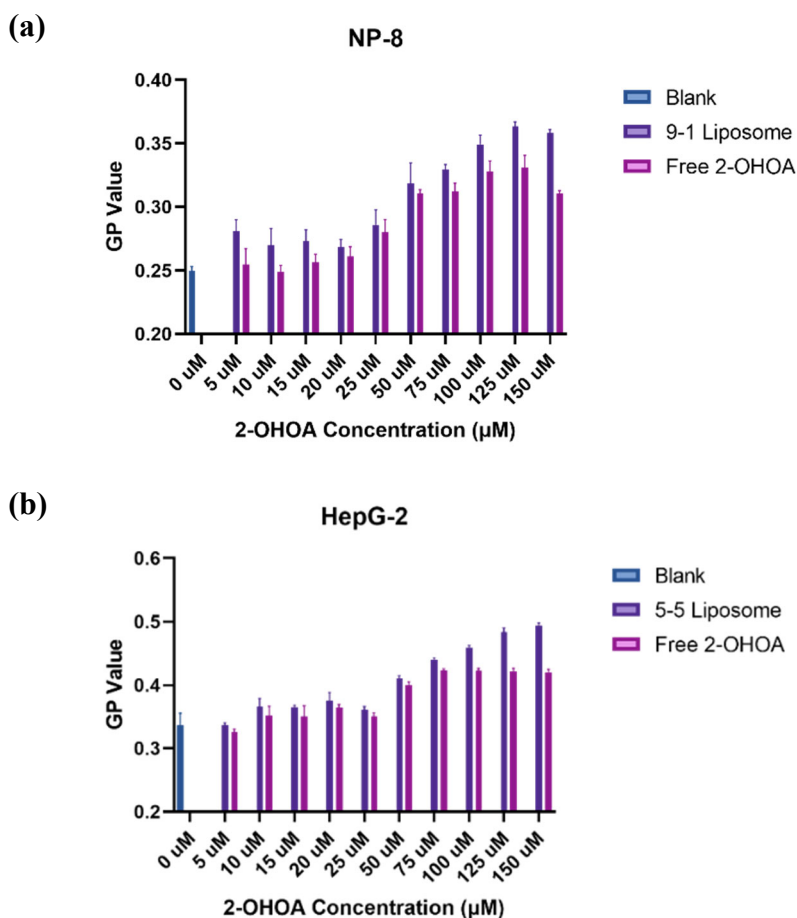

**Figure S-2.** Comparison of the influence of liposome formulation and free 2-OHOA on the cell membrane *GP* value variations. **(a)** NP-8 cell *GP* values after 24 h treatment using 9-1 liposomes and free 2-OHOA at different concentrations; **(b)** HepG-2 cell *GP* values after 24 hours treatment using 5-5 liposomes and free 2-OHOA at different concentrations. the *GP* values were obtained using fluorescence spectrometer (measured at 37°C, excitation wavelength was set at 345 nm, emission spectra were collected from 400 to 600 nm), *GP* values were calculated according to the equation described in experimental section. Error bars represent  $\pm s.d.$  ( $n=3-5$ )

47 **5. Lipid droplet staining and observation**

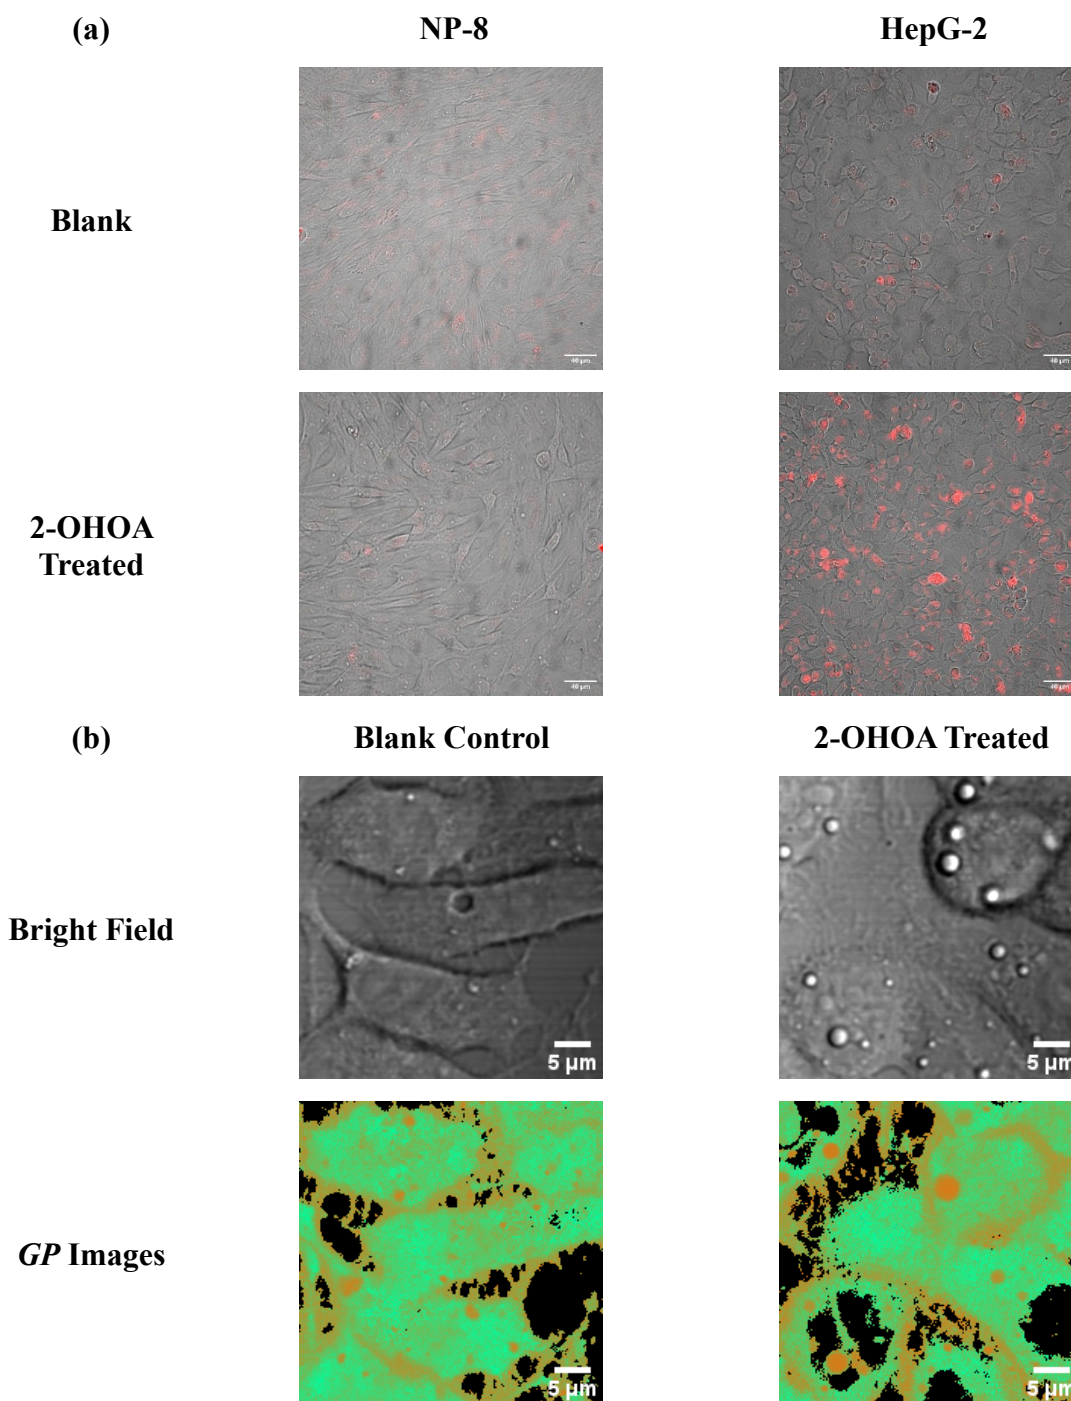

**Figure S-3.** Lipid droplets images. **(a)** Fluorescence microscopy images of Lipi-Red stained NP-8 and HepG-2 cells. The shown images are merged from bright field image and red channel image. Magnification was 40 times. Scale bars represent 40  $\mu\text{m}$ . **(b)** Bright field and GP images of HepG-2 with and without 2-OHOA treatments, scale bars represent 5  $\mu\text{m}$ . For the treatment group, cells were incubated with 100  $\mu\text{M}$  2-OHOA for 24 h before staining and imaging.

49 6. Illustration of endocytosis-dependent enhancement of 2-OHOA liposome  
 50 performance

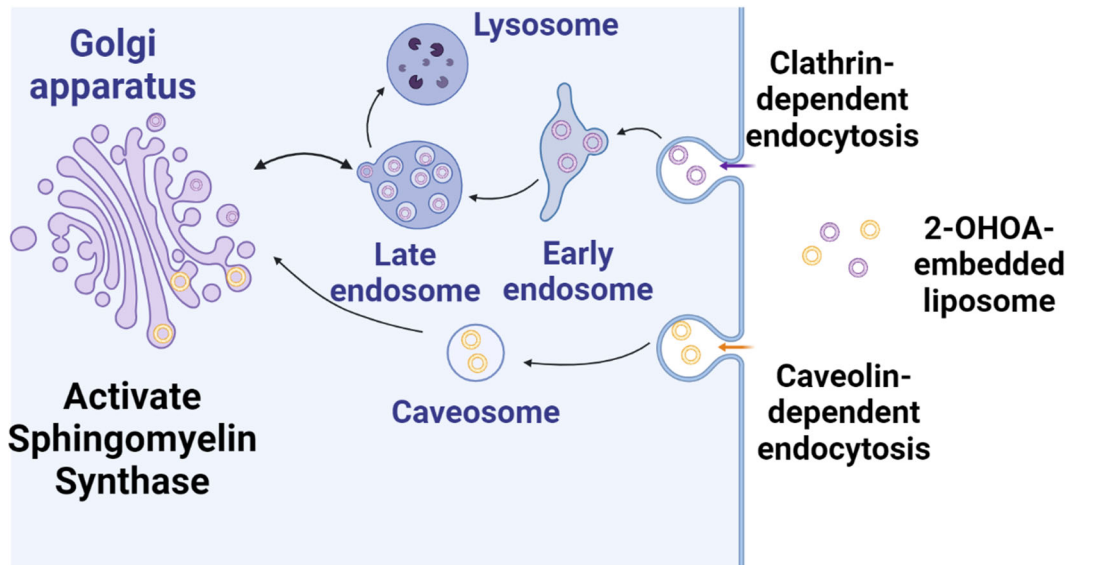

51 **Figure S-4.** Schematic illustration depicts a hypothetical scenario of the endocytosis  
 process of 2-OHOA-embedded liposomes, enhancing the impact of 2-OHOA on cancer  
 cells.

52 7. MTT Assay  
 53

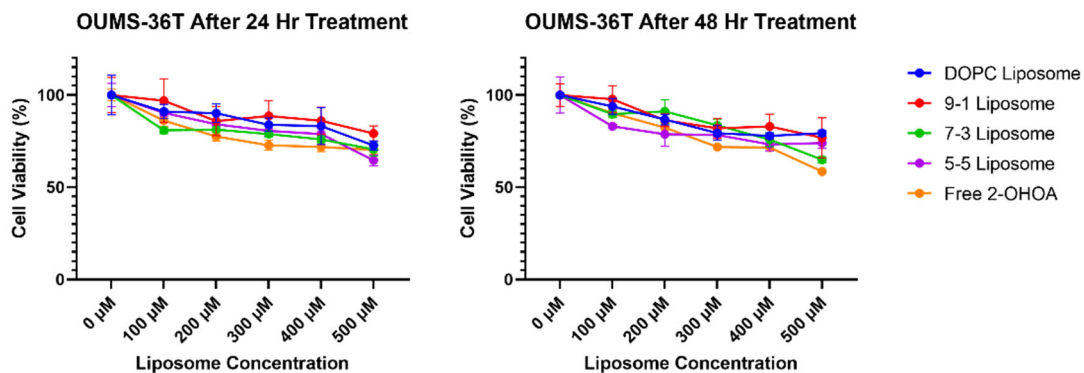

**Figure S-5.** MTT assay results. OUMS-36T cells were treated with different liposomes as  
 well as free 2-OHOA at different concentrations for 24 h and 48 h. Error bars represent  $\pm$   
 standard deviations,  $n=3$ .

54  
 55

56 8. Anticancer performance of 2-OHOA embedded liposome

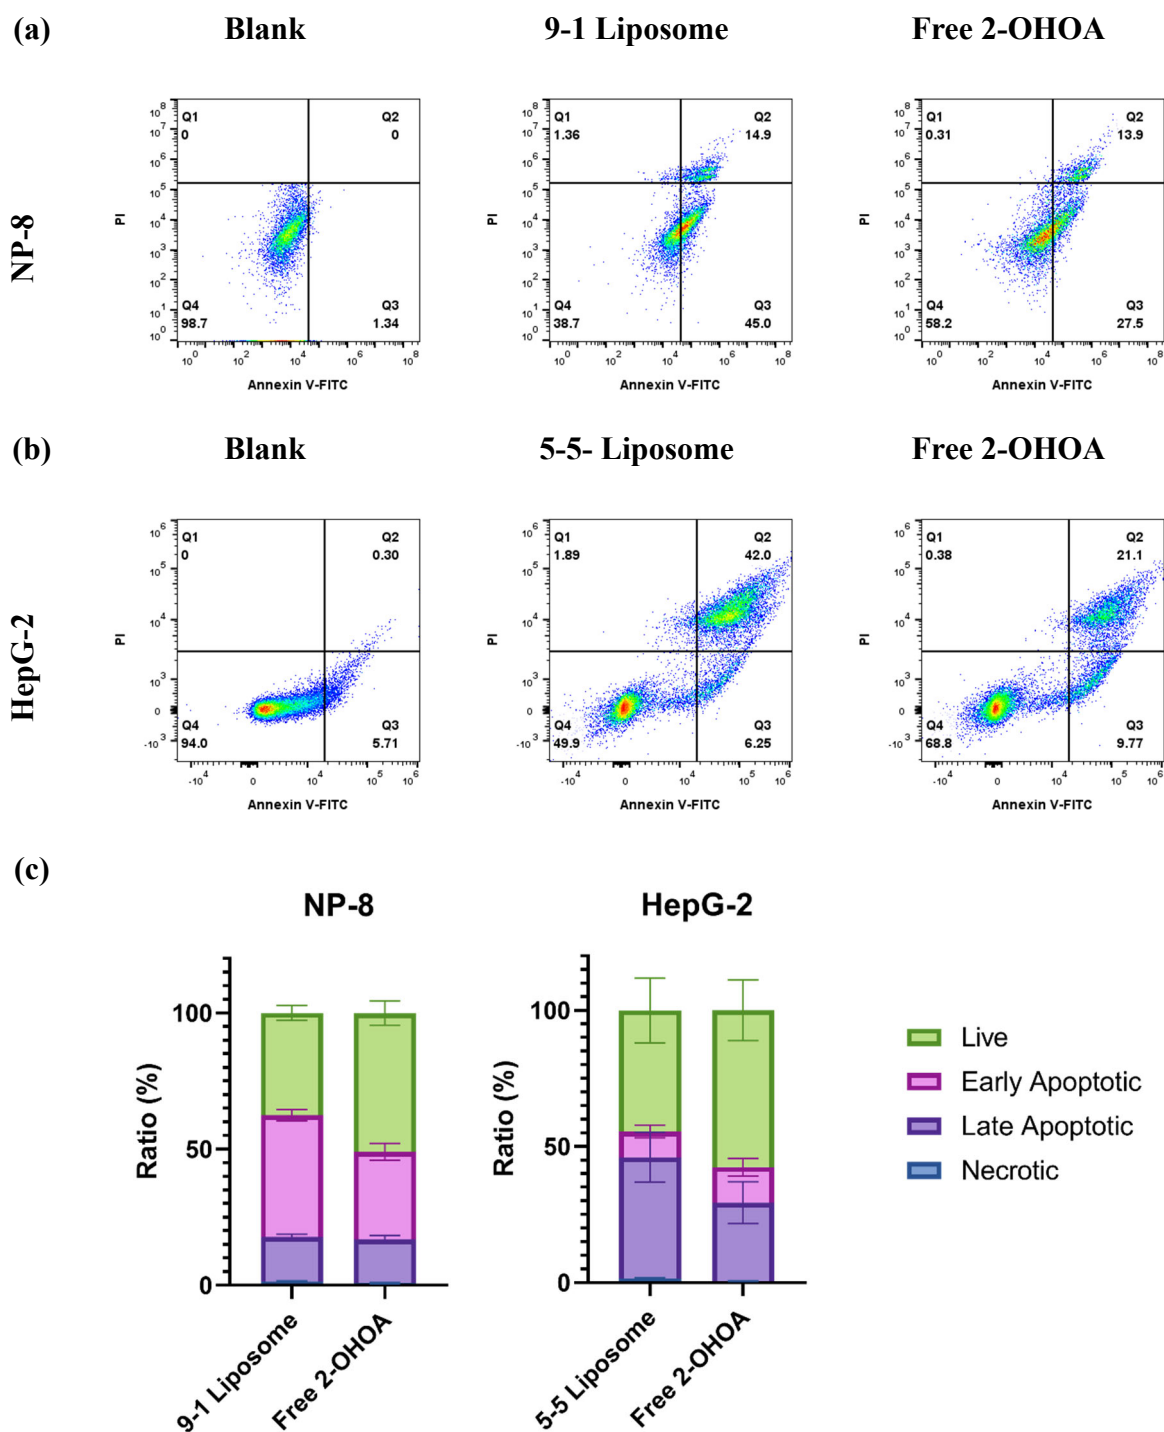

**Figure S-6.** Apoptosis assay result. Annexin-V/PI assay flow cytometry result dot graph of (a) NP-8 cells and (b) HepG-2 cells. (c) Summarized apoptotic ratio of NP-8 and HepG-2 cells after treatments. NP-8 cells were treated for 48 h with 9-1 liposome (containing 100  $\mu$ M 2-OHOA) or free 2-OHOA (100  $\mu$ M); HepG-2 cells were treated for 48 h with 5-5 liposome (containing 100  $\mu$ M 2-OHOA) or free 2-OHOA (100  $\mu$ M). Error bars represent  $\pm$  *s.d* (*n*=3).

57 **9. G-factor calibration of GP images using a reference solution**

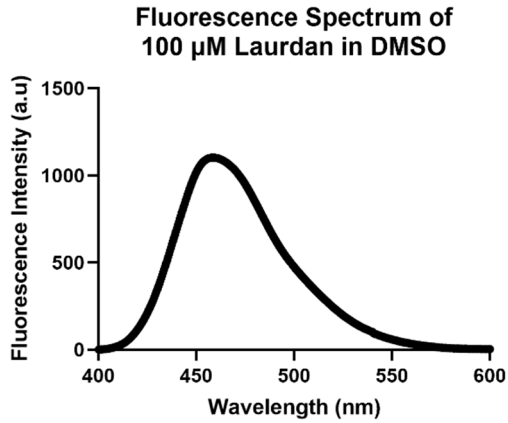

**Figure S-7.** Fluorescence spectrum of Laurdan (100 μM) in DMSO. Data was obtained using fluorescence spectrometer (FP-8500, Jasco, Japan). The excitation was set as 345 nm, and emission fluorescence intensity was measured from 400 to 600 nm wavelength.

58

59 Laurdan (100 μM) in DMSO was used as the reference solution for calibration. Laurdan  
60 fluorescence spectrum in reference solution was measured using fluorescence spectrometer  
61 (FP-8500, Jasco, Japan) with an excitation light of 345 nm wavelength. The reference  $GP$   
62 value ( $GP_r$ ) was calculated according to equation (S-1).

63 
$$GP_r = \frac{(I_{440} - I_{490})}{(I_{440} + I_{490})} \quad (\text{S-1})$$

64 where  $I_{440}$  and  $I_{490}$  represent the Laurdan fluorescence intensity at wavelengths of 440 nm  
65 and 490 nm, respectively.

66 The reference solution was imaged using two-photon microscopy, and the fluorescence  
67 images of the blue and cyan channels were obtained, and the Laurdan calibration factor  
68 ( $G_{Laurdan}$ ) was calculated according to equation (S-2).

69 
$$G_{Laurdan} = \frac{I_{blue} \times (1 - GP_r)}{I_{cyan} \times (1 + GP_r)} \quad (\text{S-2})$$

70 Where  $I_{blue}$  is the is the Laurdan fluorescence intensity of the blue channel and  $I_{cyan}$  is the  
71 Laurdan fluorescence intensity of the cyan channel;

72 The cell  $GP$  images were obtained according to equation (S-3).

73 
$$GP_m = \frac{I_{blue} - (G_{Laurdan} \times I_{cyan})}{I_{blue} + (G_{Laurdan} \times I_{cyan})} \quad (\text{S-3})$$

74 Where  $GP_m$  is the  $GP$  value calculated using the two-photon microscopy images;  $I_{blue}$  is  
75 the Laurdan fluorescence intensity of the blue channel and  $I_{cyan}$  is the Laurdan fluorescence  
76 intensity of the cyan channel;  $G_{Laurdan}$  is the Laurdan calibration factor.

77

## 78 10. High-performance thin film chromatography (HPTLC) results

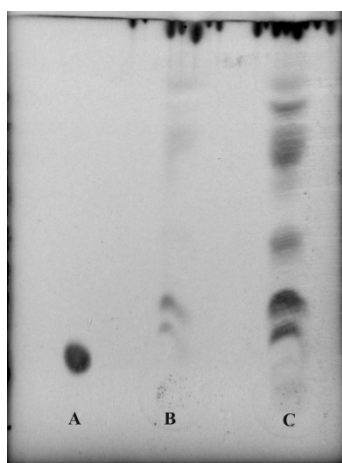

79

80 **Figure S-8.** NP-8 cell membrane lipid HPTLC results. **A:** brain sphingomyelin standard  
81 sample (1 mg/mL); **B:** extracted lipid from NP-8 cells (no treatment; phospholipid lipid 1  
82 mg/mL); **C:** extracted lipid from NP-8 cells (treated for 24 h using 100  $\mu\text{M}$  2-OHOA;  
83 phospholipid lipid 1 mg/mL).
